# Supplementary material
Source: PubMed Central journal article supplement (PMC2930694)
Supplement: supp_M110.151803_jbc.M110.151803-4.pdf [file supp_M110.151803_jbc.M110.151803-4.pdf]

## Supplemental Figure 4

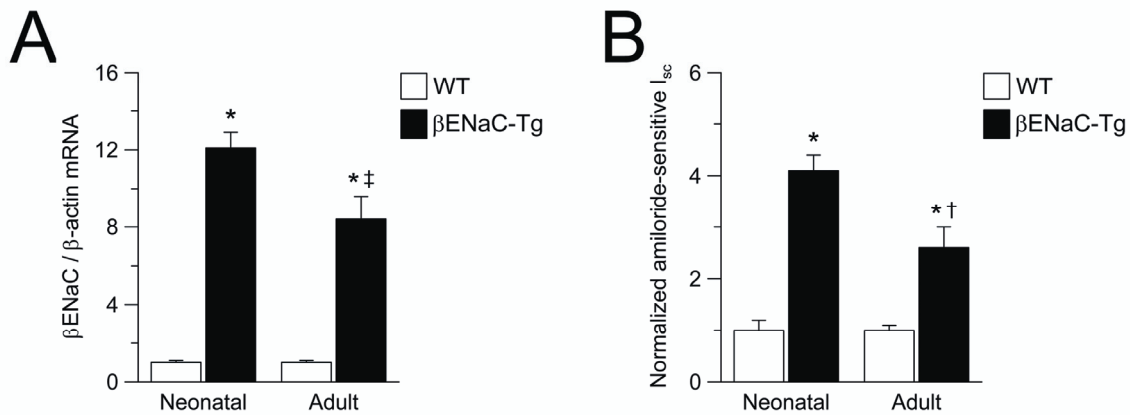

**Supplemental Figure 4.** Age-dependency of CCSP-driven overexpression of  $\beta$ ENaC and relationship to airway  $\text{Na}^+$  absorption in  $\beta$ ENaC-Tg mice. (A) Expression levels of  $\beta$ ENaC transcripts in lungs from neonatal (1 week old) and adult (6 week old)  $\beta$ ENaC-Tg mice, normalized to wild-type (WT) littermates (open bars).  $n = 11 - 13$  mice per group. \*,  $P < 0.001$  compared with WT at same age. †,  $P < 0.05$  compared with neonatal  $\beta$ ENaC-Tg mice. (B) Amiloride-sensitive short circuit current ( $I_{sc}$ ) in neonatal (1 week old) and adult (6 week old)  $\beta$ ENaC-Tg mice (closed bars) normalized to WT littermates (open bars).  $n = 7 - 13$  mice per group. \*,  $P < 0.01$  compared with at same age. †,  $P < 0.05$  compared with neonatal  $\beta$ ENaC-Tg mice.
